# Supplementary material for: The chemical landscape of the human ribosome at 1.67 Å resolution
Source: bioRxiv or medRxiv preprint supplement (doi:10.1101/2023.02.28.530191), 2023-02-28
Supplement: Supplementary file [file media-1.pdf]

Supplementary Table 1

|                                           | <b>Homoharringtonine</b> | <b>Cycloheximide</b> | <b>Blasticidin S</b> |
|-------------------------------------------|--------------------------|----------------------|----------------------|
| <b>Data</b>                               |                          |                      |                      |
| Number of collected movies                | 9973                     | 1393                 | 1401                 |
| Initial particles images                  | 1147785                  | 182359               | 180106               |
| Final particle images                     | 1088709                  | 173946               | 159962               |
| Map resolution (Å)                        | 1.67                     | 1.90                 | 1.86                 |
| Map sharpening b factor (Å <sup>2</sup> ) | 40.7                     | 38.6                 | 40.8                 |
| <b>Model composition</b>                  |                          |                      |                      |
| Protein residues                          | 6578                     | 6578                 | 6578                 |
| RNA residues                              | 3571                     | 3571                 | 3571                 |
| Non-hydrogen atoms                        | 142230                   | 140119               | 140236               |
| Waters                                    | 11962                    | 9892                 | 10089                |
| Ions                                      | 392                      | 390                  | 390                  |
| Ligands                                   | 3                        | 3                    | 3                    |
| <b>Isotopic B factors (Å<sup>2</sup>)</b> |                          |                      |                      |
| Protein                                   | 35.0                     | 40.5                 | 36.9                 |
| RNA                                       | 40.1                     | 44.5                 | 42.7                 |
| Waters                                    | 28.7                     | 29.4                 | 27.4                 |
| Ligands                                   | 22.6                     | 31.7                 | 29.6                 |
| <b>R.m.s. deviations</b>                  |                          |                      |                      |
| Bond lengths (Å)                          | 0.014                    | 0.014                | 0.014                |
| Bond angles (°)                           | 1.929                    | 1.867                | 1.872                |
| <b>Validation</b>                         |                          |                      |                      |
| Molprobit score                           | 0.85                     | 0.78                 | 0.78                 |
| Clashscore                                | 1.29                     | 0.91                 | 0.95                 |
| <b>Ramachandran plot (%)</b>              |                          |                      |                      |
| Favored                                   | 98.33                    | 98.02                | 98.15                |
| Allowed                                   | 1.65                     | 1.94                 | 1.82                 |
| Outliers                                  | 0.02                     | 0.03                 | 0.03                 |
| <b>RNA geometry (%)</b>                   |                          |                      |                      |
| Probably wrong sugar puckers              | 1.46                     | 1.20                 | 1.37                 |
| Bad bonds                                 | 0.04                     | 0.05                 | 0.05                 |
| Bad angles                                | 0.66                     | 0.53                 | 0.53                 |
