# Supplementary material for: The chemical landscape of the human ribosome at 1.67 Å resolution
Source: bioRxiv or medRxiv preprint supplement (doi:10.1101/2023.02.28.530191), 2023-02-28
Supplement: Supplementary file [file media-2.pdf]

Supplementary Table 2

| rRNA | Position | Natchiar <i>et al.</i> <sup>25</sup> | Taoka <i>et al.</i> <sup>21</sup> (MS) | This study | CH...O interaction acceptor | Hydrophobic interaction | H-bond partner |
|------|----------|--------------------------------------|----------------------------------------|------------|-----------------------------|-------------------------|----------------|
| 28S  | 237      | xp6G                                 |                                        |            |                             |                         |                |
| 28S  | 373      | Gm                                   |                                        |            |                             |                         |                |
| 28S  | 398      | Am                                   | Am                                     | Am         | Water / Protein carbonyl    |                         |                |
| 28S  | 400      |                                      | Am                                     | Am         |                             | LEU side chain          |                |
| 28S  | 729      | m2G                                  |                                        |            |                             |                         |                |
| 28S  | 978      | m2G                                  |                                        |            |                             |                         |                |
| 28S  | 1316     | Gm                                   | Gm                                     | Gm         | PO4 / Water                 |                         | Ribose C5'     |
| 28S  | 1322     | m1A                                  | m1A                                    | m1A        | PO4                         |                         |                |
| 28S  | 1323     |                                      | Am                                     |            |                             |                         |                |
| 28S  | 1326     | Am                                   | Am                                     | Am         | Water / Ribose O4'          |                         |                |
| 28S  | 1340     |                                      | Cm                                     | Cm         | Ribose O4'                  | TRP / LYS side chains   |                |
| 28S  | 1348     | xp4U                                 |                                        |            |                             |                         |                |
| 28S  | 1456     | m3C                                  |                                        |            |                             |                         |                |
| 28S  | 1517     | m2G                                  |                                        |            |                             |                         |                |
| 28S  | 1522     | Gm                                   | Gm                                     | Gm         | Ribose O4'                  |                         | Ribose C5'     |
| 28S  | 1524     | Am                                   | Am                                     | Am         | Ribose O4' / PO4 / Water    |                         |                |
| 28S  | 1534     | Am                                   | Am                                     | Am         | Ribose O4'                  |                         | Base C6        |
| 28S  | 1536     |                                      | ψ                                      | ψ          |                             |                         | Water          |
| 28S  | 1574     | xp6G                                 |                                        |            |                             |                         |                |
| 28S  | 1582     | ψ                                    | ψ                                      | ψ          |                             |                         | Base O2        |
| 28S  | 1605     | m7G                                  |                                        |            |                             |                         |                |
| 28S  | 1625     | Gm                                   | Gm                                     | Gm         | PO4 / TYR side chain        | TYR side chain          |                |
| 28S  | 1659     | xp4U                                 |                                        |            |                             |                         |                |
| 28S  | 1677     | ψ                                    | ψ                                      | ψ          |                             |                         | PO4            |
| 28S  | 1683     | ψ                                    | ψ                                      | ψ          |                             |                         | Water          |
| 28S  | 1744     |                                      | ψ                                      | ψ          |                             |                         | Water          |

Supplementary Table 2

|     |      |      |    |    |                          |    |                |
|-----|------|------|----|----|--------------------------|----|----------------|
| 28S | 1760 |      | Gm | ND |                          |    |                |
| 28S | 1773 |      | Um | ND |                          |    |                |
| 28S | 1779 |      | ψ  | ND |                          |    |                |
| 28S | 1781 |      | ψ  | ψ  |                          |    | Water          |
| 28S | 1782 |      | ψ  | ψ  |                          |    | Water          |
| 28S | 1792 |      | ψ  | ψ  |                          |    | Water          |
| 28S | 1797 | xe7G |    |    |                          |    |                |
| 28S | 1860 | m1ψ  | ψ  | ψ  |                          |    | Water          |
| 28S | 1862 |      | ψ  | ψ  |                          |    | Water          |
| 28S | 1866 | m3U  |    |    |                          |    |                |
| 28S | 1871 | Am   | Am | Am | Water                    |    |                |
| 28S | 1881 |      | Cm |    |                          |    |                |
| 28S | 1883 | Gm   |    |    |                          |    |                |
| 28S | 1909 | xp7G |    |    |                          |    |                |
| 28S | 2050 | Gm   |    |    |                          |    |                |
| 28S | 2297 | xe7G |    |    |                          |    |                |
| 28S | 2351 |      | Cm | Cm |                          |    | MET side chain |
| 28S | 2363 | Am   | Am | Am | Water                    |    |                |
| 28S | 2364 | Gm   | Gm | Gm | Ribose O4'               |    |                |
| 28S | 2365 | Cm   | Cm | Cm | Water / Ribose O4'       |    | Base C6        |
| 28S | 2380 | m6G  |    |    |                          |    |                |
| 28S | 2401 | Am   | Am | Am | Water / Protein carbonyl |    |                |
| 28S | 2415 |      | Um | Um | ND                       | ND |                |
| 28S | 2422 | Cm   | Cm | Cm | Water                    |    |                |
| 28S | 2424 | Gm   | Gm | Gm | Ribose O4'               |    | Ribose C1'     |
| 28S | 2508 | ψ    | ψ  | ψ  |                          |    | PO4            |
| 28S | 2522 | m7G  |    |    |                          |    |                |
| 28S | 2754 | xp6G |    |    |                          |    |                |
| 28S | 2632 |      | ψ  | ψ  |                          |    | Water          |

Supplementary Table 2

|     |      |       |     |     |                             |                |         |
|-----|------|-------|-----|-----|-----------------------------|----------------|---------|
| 28S | 2773 | Gm    |     |     |                             |                |         |
| 28S | 2786 | xp3Cm |     |     |                             |                |         |
| 28S | 2787 |       | Am  | Am  | PO4                         | Ribose C3'     |         |
| 28S | 2804 | Cm    | Cm  | Cm  | Ribose O4' / TYR side chain | TYR side chain |         |
| 28S | 2815 |       | Am  | Am  | PO4                         |                |         |
| 28S | 2824 |       | Cm  | Cm  | Water                       |                |         |
| 28S | 2837 |       | Um  | Um  | Water / Protein carbonyl    |                |         |
| 28S | 2835 |       | ψ   | A   |                             |                |         |
| 28S | 2839 |       | ψ   | ψ   |                             |                | Water   |
| 28S | 2861 | Cm    | Cm  | Cm  | Ribose O2'                  | Base C5        |         |
| 28S | 2876 |       | Gm  | Gm  | Water / PO4                 |                |         |
| 28S | 3627 |       | Gm  | Gm  | Water / PO4                 |                |         |
| 28S | 3637 |       | ψ   | ψ   |                             |                | Water   |
| 28S | 3639 |       | ψ   | ψ   |                             |                | Water   |
| 28S | 3695 |       | ψ   | ψ   |                             |                | Water   |
| 28S | 3701 | Cm    | Cm  | Cm  | PO4                         |                |         |
| 28S | 3715 | ψ     | ψ   | ψ   |                             |                | Base O2 |
| 28S | 3718 | Am    | Am  | Am  | Ribose O2'                  |                |         |
| 28S | 3723 | Am    | Am  | Am  | ND                          | ND             |         |
| 28S | 3729 | ψ     | ψ   | ψ   |                             |                | PO4     |
| 28S | 3734 |       | ψ   | ND  |                             |                |         |
| 28S | 3744 |       | Gm  | Gm  | Ribose O4'                  |                |         |
| 28S | 3758 |       | ψ   | ND  |                             |                |         |
| 28S | 3760 |       | Am  | ND  |                             |                |         |
| 28S | 3762 | m1ψ   | ψ   | ND  |                             |                |         |
| 28S | 3764 | ψ     | ψ   | ND  |                             |                |         |
| 28S | 3768 |       | ψ   | ND  |                             |                |         |
| 28S | 3770 |       | ψ   | ND  |                             |                |         |
| 28S | 3782 | m5C   | m5C | m5C | Water                       |                |         |

Supplementary Table 2

|     |      |       |    |    |                    |                |       |
|-----|------|-------|----|----|--------------------|----------------|-------|
| 28S | 3785 | Am    | Am | Am |                    | Base C5 / CM'  |       |
| 28S | 3792 | Gm    | Gm | Gm | Water              |                |       |
| 28S | 3808 |       | Cm | Cm | Ribose O4'         |                |       |
| 28S | 3818 |       | Ψm | Ψm | Water              | HIS side chain | PO4   |
| 28S | 3822 |       | Ψ  | ND |                    |                |       |
| 28S | 3825 | Am    | Am | Am | Water              |                |       |
| 28S | 3830 |       | Am | Am | Water              |                |       |
| 28S | 3841 |       | Cm | Cm | Water              |                |       |
| 28S | 3844 |       | Ψ  | Ψ  |                    |                | Water |
| 28S | 3851 |       | Ψ  | Ψ  |                    |                | Water |
| 28S | 3853 |       | Ψ  | Ψ  |                    |                | PO4   |
| 28S | 3867 | Am    | Am | Am | Water / Ribose O4' | Base C2        |       |
| 28S | 3869 | Cm    | Cm | Cm | Ribose O4'         | LYS side chain |       |
| 28S | 3880 | xp7G  |    |    |                    |                |       |
| 28S | 3884 |       | Ψ  | Ψ  |                    |                | Water |
| 28S | 3887 | Cm    | Cm | Cm | Water              | Base C2        |       |
| 28S | 3897 | ac7G  |    |    |                    |                |       |
| 28S | 3899 | ac7Gm | Gm | Gm | Water              |                |       |
| 28S | 3909 | Cm    |    |    |                    |                |       |
| 28S | 3920 |       | Ψ  | Ψ  |                    |                | Water |
| 28S | 3925 |       | Um | Um | Protein carbonyl   | PRO side chain |       |
| 28S | 3944 |       | Gm | ND |                    |                |       |
| 28S | 3959 |       | Ψ  | ND |                    |                |       |
| 28S | 4042 |       | Gm | ND |                    |                |       |
| 28S | 4054 |       | Cm | ND |                    |                |       |
| 28S | 4083 | m5U   |    |    |                    |                |       |
| 28S | 4129 | m6G   |    |    |                    |                |       |
| 28S | 4185 | m6G   |    |    |                    |                |       |
| 28S | 4194 | xp4U  |    |    |                    |                |       |

Supplementary Table 2

|     |      |        |     |     |                                 |                |            |
|-----|------|--------|-----|-----|---------------------------------|----------------|------------|
| 28S | 4196 | Gm     | Gm  | Gm  | Ribose O2' / Ribose O4' / Water | Ribose C1'     |            |
| 28S | 4220 | m6A    | m6A | m6A | Ribose O2'                      |                |            |
| 28S | 4227 |        | Um  | Um  | Ribose O4' / Water              |                |            |
| 28S | 4228 |        | Gm  | Gm  | Water / THR side chain          |                |            |
| 28S | 4293 | ψ      | ψ   | ψ   |                                 |                | Ribose O2' |
| 28S | 4296 | m1ψ    | ψ   | ψ   |                                 |                | Water      |
| 28S | 4299 |        | ψ   | ψ   |                                 |                | Water      |
| 28S | 4306 | Um     | Um  | Um  | Water / TYR side chain          |                |            |
| 28S | 4312 |        | ψ   | ψ   |                                 |                | Water      |
| 28S | 4335 | m5C    |     |     |                                 |                |            |
| 28S | 4353 |        | ψ   | ψ   |                                 |                | Water      |
| 28S | 4355 | xe6G   |     |     |                                 |                |            |
| 28S | 4361 |        | ψ   | ψ   |                                 |                | Water      |
| 28S | 4370 | Gm     | Gm  | Gm  | ND                              | ND             |            |
| 28S | 4371 | m2xp7G |     |     |                                 |                |            |
| 28S | 4392 |        | Gm  | Gm  |                                 | Base / CM5     |            |
| 28S | 4403 | ψ      | ψ   | ψ   |                                 |                | Water      |
| 28S | 4415 | m1A    |     |     |                                 |                |            |
| 28S | 4420 |        | ψ   | ψ   |                                 |                | PO4        |
| 28S | 4423 |        | ψ   | ψ   |                                 |                | Water      |
| 28S | 4431 |        | ψ   | ψ   |                                 |                | Water      |
| 28S | 4442 | ψ      | ψ   | ψ   |                                 |                | Water      |
| 28S | 4447 | m5C    | m5C | m5C | Ribose O4'                      | CM'            |            |
| 28S | 4450 | ψ      |     |     |                                 |                |            |
| 28S | 4456 |        | Cm  | Cm  |                                 | PRO side chain |            |
| 28S | 4457 |        | ψ   | ψ   |                                 |                | Water      |
| 28S | 4471 |        | ψ   | ψ   |                                 |                | Water      |
| 28S | 4472 | m6G    |     |     |                                 |                |            |
| 28S | 4483 | m4C    |     |     |                                 |                |            |

Supplementary Table 2

|     |      |     |     |     |                    |                             |            |
|-----|------|-----|-----|-----|--------------------|-----------------------------|------------|
| 28S | 4493 |     | ψ   | ψ   |                    |                             | Ribose O2' |
| 28S | 4494 | Gm  | Gm  | Gm  | Ribose O4'         | VAL side chain              |            |
| 28S | 4498 |     | Um  | Um  | Ribose O4'         | Base C8                     |            |
| 28S | 4499 |     | Gm  | Gm  | Water / Ribose O2' |                             |            |
| 28S | 4500 | ψ   | ψ   | ψ   |                    |                             | Base O4    |
| 28S | 4521 |     | ψ   | ψ   |                    |                             | Water      |
| 28S | 4523 | Am  | Am  | Am  | PO4                |                             |            |
| 28S | 4529 | m6G |     |     |                    |                             |            |
| 28S | 4530 | m3U | m3U | m3U | Water              |                             |            |
| 28S | 4531 | ψ   |     |     |                    |                             |            |
| 28S | 4532 |     | ψ   | ψ   |                    |                             | Water      |
| 28S | 4536 | Cm  | Cm  | Cm  | Ribose O4'         | CM'                         |            |
| 28S | 4550 | m7G |     |     |                    |                             |            |
| 28S | 4552 |     | ψ   | ψ   |                    |                             | Water      |
| 28S | 4564 | m7A |     |     |                    |                             |            |
| 28S | 4571 | Am  | Am  | Am  | Water              | Ribose C1'                  |            |
| 28S | 4576 |     | ψ   | ψ   |                    |                             | Water      |
| 28S | 4579 |     | ψ   | ψ   |                    |                             | Water      |
| 28S | 4590 |     | Am  | Am  | Water              |                             |            |
| 28S | 4597 | m3U |     |     |                    |                             |            |
| 28S | 4618 |     | Gm  | Gm  | Water              |                             |            |
| 28S | 4620 | Um  | Um  | Um  | Water              | Ribose C5' / PRO side chain |            |
| 28S | 4623 | Gm  | Gm  | Gm  | Ribose O4'         |                             |            |
| 28S | 4628 | ψ   | ψ   | ψ   |                    |                             | Water      |
| 28S | 4636 | ψ   | ψ   | ND  |                    |                             |            |
| 28S | 4637 | Gm  | Gm  | Gm  | Base O2            |                             |            |
| 28S | 4671 | m4C |     |     |                    |                             |            |
| 28S | 4673 |     | ψ   | ψ   |                    |                             | Water      |
| 28S | 4689 |     | ψ   | ψ   |                    |                             | Water      |

Supplementary Table 2

|       |      |      |     |     |                |
|-------|------|------|-----|-----|----------------|
| 28S   | 4690 | ac7G |     |     |                |
| 28S   | 4870 | Gm   |     |     |                |
| 28S   | 4872 | m2G  |     |     |                |
| 28S   | 4972 |      | ψ   | ψ   | Water          |
| 28S   | 5001 |      | ψ   | ψ   | Water          |
| 28S   | 5010 |      | ψ   | ψ   | Water          |
| 5.8S  | 14   | Um   | Um  |     |                |
| 5.8S  | 55   |      | ψ   | ψ   | Water          |
| 5.8S  | 69   |      | ψ   | ψ   | Water          |
| 5.8S  | 75   |      | Gm  | Gm  | MET side chain |
| Total |      | 102  | 137 | 117 |                |

Supplementary Table 2
